# Supplementary material for: The ZorO-OrzO type I toxin–antitoxin locus: repression by the OrzO antitoxin
Source: PubMed Central journal article supplement (PMC3919570; doi:10.1093/nar/gkt1018), 2013-11-06
Supplement: supp_gkt1018_nar-01581-v-2013-File002.pdf [file supp_gkt1018_nar-01581-v-2013-File002.pdf]

**Supplementary Table S1. Strains used in this study.**

| Name                             | Relevant genotype or description              | Source       |
|----------------------------------|-----------------------------------------------|--------------|
| <i>Escherichia coli</i> EDL933   | Wildtype EHEC, O157:H7                        | D. Friedman  |
| DJ480                            | MG1655 $\Delta lacX74$ (wild type strain)     | D. Jin, (20) |
| UTK007                           | DJ480 PCP18- <i>araE</i>                      | This study   |
| UTK008                           | UTK007 $\Delta hfq::kan$                      | This study   |
| UTK011                           | UTK007 $\Delta rnc::kan$                      | This study   |
| Plasmids                         |                                               |              |
| pKD4                             | Km <sup>R</sup>                               | (24)         |
| pBR-pLac                         | Amp <sup>R</sup> ; P <sub>LacO</sub> promoter | (20)         |
| pEF21                            | Cm <sup>R</sup> ; P <sub>BAD</sub> promoter   | (17)         |
| pBR-pLac- <i>orzO</i>            | Amp <sup>R</sup>                              | This study   |
| pEF21- <i>zoroO</i>              | Cm <sup>R</sup>                               | This study   |
| pBR-pLac- <i>orzO-ohsC</i>       | Amp <sup>R</sup>                              | This study   |
| pBR-pLac- <i>orzO-istR</i>       | Amp <sup>R</sup>                              | This study   |
| pBR-pLac- <i>orzP</i>            | Amp <sup>R</sup>                              | This study   |
| pBR-pLac- <i>orzO</i> V1         | Amp <sup>R</sup>                              | This study   |
| pEF21- <i>zoroO</i> V1           | Cm <sup>R</sup>                               | This study   |
| pBR-pLac- <i>orzP</i> V1         | Amp <sup>R</sup>                              | This study   |
| pBR-pLac- <i>orzO</i> 8(1)9      | Amp <sup>R</sup>                              | This study   |
| pBR-pLac- <i>orzO</i> 10(1)7     | Amp <sup>R</sup>                              | This study   |
| pBR-pLac- <i>orzO</i> 9(1)8      | Amp <sup>R</sup>                              | This study   |
| pBR-pLac- <i>orzO</i> $\Delta$ 3 | Amp <sup>R</sup>                              | This study   |
| pBR-pLac- <i>orzO</i> $\Delta$ 6 | Amp <sup>R</sup>                              | This study   |
| pBR-pLac- <i>orzO</i> 5(2)11     | Amp <sup>R</sup>                              | This study   |
| pBR-pLac- <i>orzO</i> 6(1)11     | Amp <sup>R</sup>                              | This study   |
| pBR-pLac- <i>orzO</i> 6(1)10(1)  | Amp <sup>R</sup>                              | This study   |
| pBR-pLac- <i>orzO</i> 1(5)1(11)  | Amp <sup>R</sup>                              | This study   |

**Supplementary Table S2. Oligonucleotides used in this study**

| Name  | Sequence (5'-3', restriction sites underlined; nucleotides altered via site directed mutagenesis in red) | Use                                                                                                                                                                   |
|-------|----------------------------------------------------------------------------------------------------------|-----------------------------------------------------------------------------------------------------------------------------------------------------------------------|
| EF506 | CCTGCTGGTGAGGCAGGTTCTTTTATTT                                                                             | OrzO Northern analysis                                                                                                                                                |
| EF511 | GAGCACGGTTAACTTTTGTGTACGCGTGT                                                                            | <i>zorO</i> Primer extension analysis                                                                                                                                 |
| EF517 | CTACAGTGACGCTAACTTGCTGATT                                                                                | OrzO Northern analysis                                                                                                                                                |
| EF524 | GTTGGTACGAAACGTTGCTCTCCG                                                                                 | <i>zorO</i> Northern analysis                                                                                                                                         |
| EF769 | CAGAATCGAAAGGTTCAAAGTACAAATAAGCATATAAGGAAAAGAGAGAATGATTGAACAAGATGGATTG                                   | UTK008 PCR ( $\Delta hfg$ )                                                                                                                                           |
| EF770 | CGCAGGATCGCTGGCTCCCCGTGTAAAAAACAGCCGAAACCTTAGAAGAAGCTCGTCAAGAAG                                          | UTK008 PCR ( $\Delta hfg$ )                                                                                                                                           |
| EF771 | GTCTGTTTCGTGTGCTGAATTGTTGACGCATTTAATTTATTGGTATCGCATGATTGAACAAGATGGA                                      | UTK011 PCR ( $\Delta rnc$ )                                                                                                                                           |
| EF772 | GATGGCAATAAATCCGCAGTAACTTTTATCGATGCTCATTCAGCTCCAGTCCAGAACTCGTCAAGAAG                                     | UTK011 PCR ( $\Delta rnc$ )                                                                                                                                           |
| EF537 | GTGGATATGGTTATAATGACGTCGTTGTTACGAA                                                                       | pBR-pLac- <i>orzO</i> PCR                                                                                                                                             |
| EF538 | GATGTGGAATTCATGTTGGGCTATTGGC                                                                             | pBR-pLac- <i>orzO</i> PCR; pBR-pLac- <i>orzO-ohsC</i> PCR; pBR-pLac- <i>orzO-istR</i> PCR; pBR-pLac- <i>orzO</i> $\Delta$ 3 PCR, pBR-pLac- <i>orzO</i> $\Delta$ 6 PCR |
| EF531 | GAGATTATAATCTGACAGGTTGGGACGTTGC                                                                          | pEF21- <i>zorO</i> PCR                                                                                                                                                |
| EF532 | GAGTTAAAGCTTGAATTAATAAAAAACAGTAATC                                                                       | pEF21- <i>zorO</i> PCR                                                                                                                                                |
| EF78  | GACACGGAAATGTTGAATAC                                                                                     | pBR-pLac- <i>orzO-ohsC</i> PCR; pBR-pLac- <i>orzO-istR</i> PCR                                                                                                        |
| EF790 | CTTTTTAACTTTAATTTTGAACAATTCGTACCAACGACGTC                                                                | pBR-pLac- <i>orzO-ohsC</i> PCR                                                                                                                                        |
| EF791 | GAAATGTTGCAAAATTAAGTTAAAAAGTAAACCCCGTTCC                                                                 | pBR-pLac- <i>orzO-ohsC</i> PCR                                                                                                                                        |
| EF792 | GCCACGGTAA GAATTC AAAGTTAAAAATAATACCG                                                                    | pBR-pLac- <i>orzO-ohsC</i> PCR                                                                                                                                        |
| EF793 | GCGGCTGGTAACCGCAGCAACATTTCTGACCAACGACGTC                                                                 | pBR-pLac- <i>orzO-istR</i> PCR                                                                                                                                        |
| EF794 | CGAAATGTTGCTGCGGTTACCGCCGCGGGCGGTGACG                                                                    | pBR-pLac- <i>orzO-istR</i> PCR                                                                                                                                        |
| EF795 | CTGTACTGCAGAAATTCAAAAAACCCCGCCGGAGCG                                                                     | pBR-pLac- <i>orzO-istR</i> PCR                                                                                                                                        |
| EF541 | CCAGCCGTGGTTATAATGACGTCGTTGGAACACG                                                                       | pBR-pLac- <i>orzP</i> PCR                                                                                                                                             |
| EF542 | GTGTTGAATTCAAAAATATCTGGG                                                                                 | pBR-pLac- <i>orzP</i> PCR                                                                                                                                             |
| EF700 | CTGACGTCGTTGGTACACGATGTTGCACAATCAGC                                                                      | pBR-pLac- <i>orzO</i> V1 PCR                                                                                                                                          |
| EF701 | GCTGATTGTGCAACATCGTGTACCAACGACGTCAG                                                                      | pBR-pLac- <i>orzO</i> V1 PCR                                                                                                                                          |
| EF725 | GATCCGGAGAGCAACGTCGTGTACCAACATACGTAAAC                                                                   | pEF21- <i>zorO</i> V1 PCR                                                                                                                                             |
| EF726 | GTTTACGTAATGTTGGTACACGACGTTGCTCTCCGGATC                                                                  | pEF21- <i>zorO</i> V1 PCR                                                                                                                                             |
| EF702 | CTGACGTCGTTGGAACGAAATGTTGCACAGGCTGTG                                                                     | pBR-pLac- <i>orzP</i> V1 PCR                                                                                                                                          |
| EF703 | CACAGCCTGTGCAACATTTCTGTTCCAACGACGTCAG                                                                    | pBR-pLac- <i>orzP</i> V1 PCR                                                                                                                                          |
| EF998 | CTGACGTCGTTGGTACCAATGTTGCACAATCAG                                                                        | pBR-pLac- <i>orzO</i> 8(1)9 PCR                                                                                                                                       |
| EF999 | CTGATTGTGCAACATTTGGTACCAACGACGTCAG                                                                       | pBR-pLac- <i>orzO</i> 8(1)9 PCR                                                                                                                                       |
| EF976 | GACGTCGTTGGTACGACATGTTGCACAATCAGCAAG                                                                     | pBR-pLac- <i>orzO</i> 10(1)7 PCR                                                                                                                                      |
| EF977 | CTTGCTGATTGTGCAACATGTCGTACCAACGACGTC                                                                     | pBR-pLac- <i>orzO</i> 10(1)7 PCR                                                                                                                                      |
| EF745 | CTGACGTCGTTGGTACGCAATGTTGCACAATCAGC                                                                      | pBR-pLac- <i>orzO</i> 9(1)8 PCR                                                                                                                                       |
| EF746 | GCTGATTGTGCAACATTTGCGTACCAACGACGTCAG                                                                     | pBR-pLac- <i>orzO</i> 9(1)8 PCR                                                                                                                                       |
| EF853 | GGTTATAATTTA GACGTC GGTACGAAATGTTGCACAATC                                                                | pBR-pLac- <i>orzO</i> $\Delta$ 3 PCR                                                                                                                                  |
| EF875 | GGTTATAATTTATTC GACGTC ACGAAATGTTGCACAATC                                                                | pBR-pLac- <i>orzO</i> $\Delta$ 6 PCR                                                                                                                                  |
| EF940 | GATACTGACGTCGTTGGATCGAAATGTTGCACAATCAGC                                                                  | pBR-pLac- <i>orzO</i> 5(2)11 PCR                                                                                                                                      |
| EF941 | GCTGATTGTGCAACATTTCCGATCCAACGACGTCAGTATC                                                                 | pBR-pLac- <i>orzO</i> 5(2)11 PCR                                                                                                                                      |
| EF934 | GATACTGACGTCGTTGGTTCGAAATGTTGCACAATCAGC                                                                  | pBR-pLac- <i>orzO</i> 6(1)11 PCR                                                                                                                                      |
| EF935 | GCTGATTGTGCAACATTTCCGACCAACGACGTCAGTATC                                                                  | pBR-pLac- <i>orzO</i> 6(1)11 PCR                                                                                                                                      |
| EF972 | CGTCGTTGGTTCGAAATGTTGCAATCAGCAAGTTAGCG                                                                   | pBR-pLac- <i>orzO</i> 6(1)10(1) PCR                                                                                                                                   |
| EF973 | CGCTAACTTGTGATTGTCAACATTTGCAACCAACGACG                                                                   | pBR-pLac- <i>orzO</i> 6(1)10(1) PCR                                                                                                                                   |
| EF944 | GATACTGACGTCCTTGGTTCGAAATGTTGCACAATCAGC                                                                  | pBR-pLac- <i>orzO</i> 1(5)1(11) PCR                                                                                                                                   |
| EF945 | GCTGATTGTGCAACATTTGCAACCAAGGACGTCAGTATC                                                                  | pBR-pLac- <i>orzO</i> 1(5)1(11) PCR                                                                                                                                   |

## WT

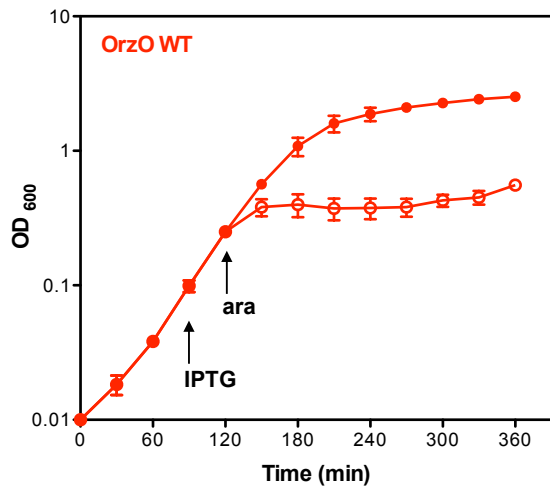

## $\Delta hfq$

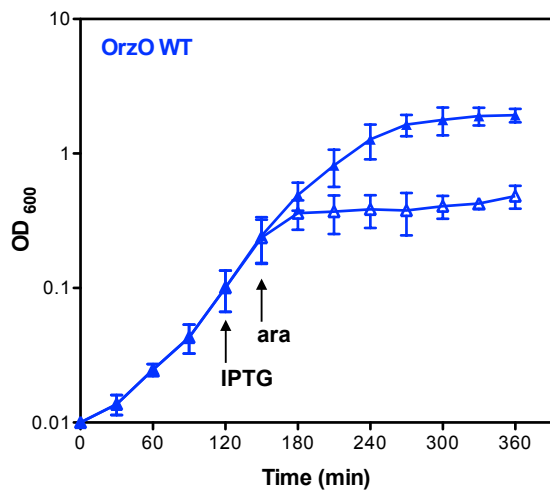

Figure S1



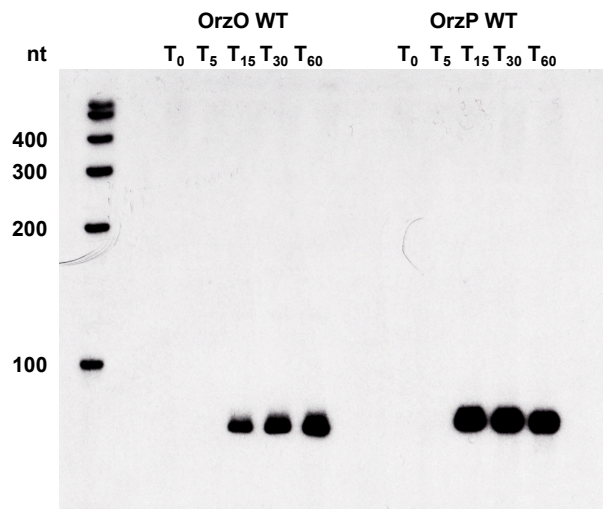

**Figure S3**

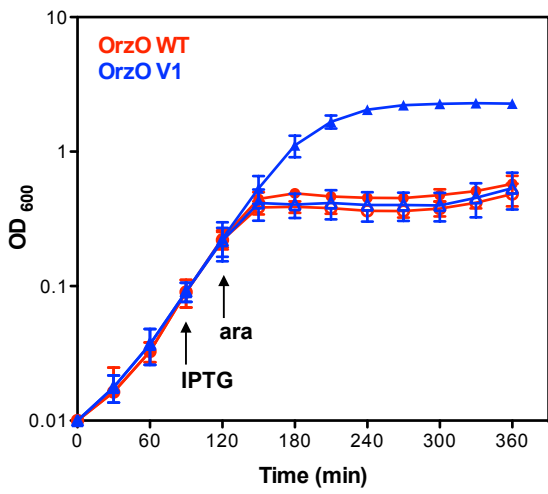

OrzO V1 5' GUUGGUACACGAUGUUGC 3'  
 |||||:|||||  
 zorO V1 3' CAACCAUGUGCUGCAACG 5'

Figure S4

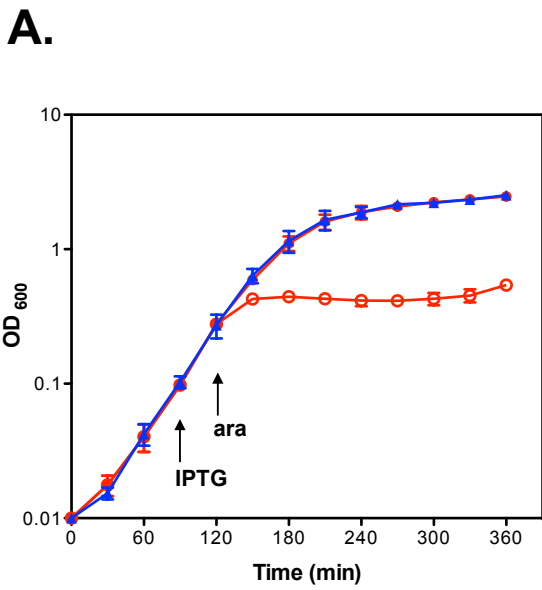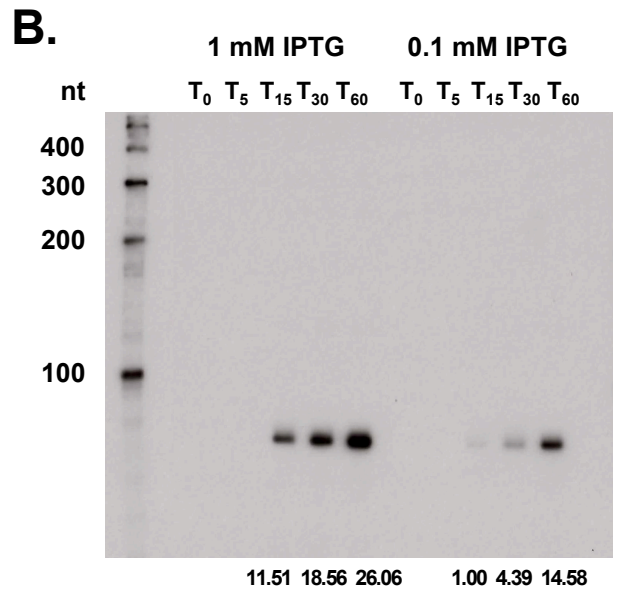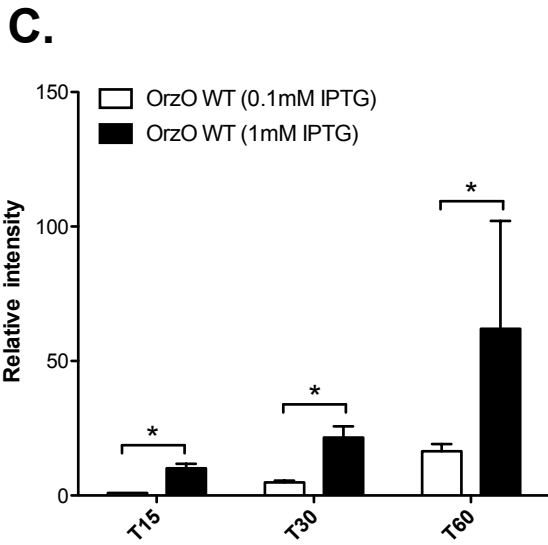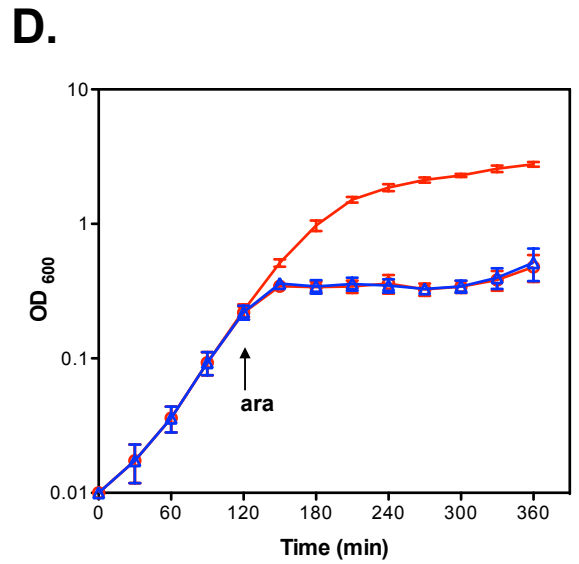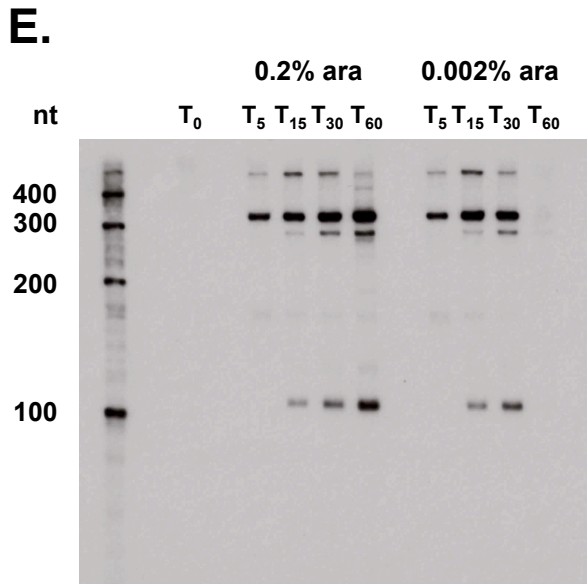

**Figure S5**

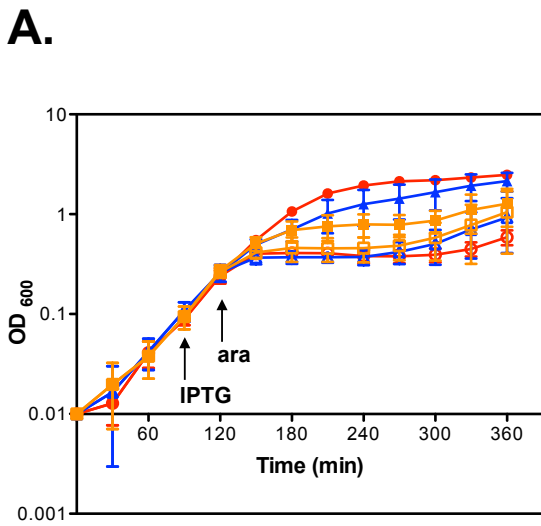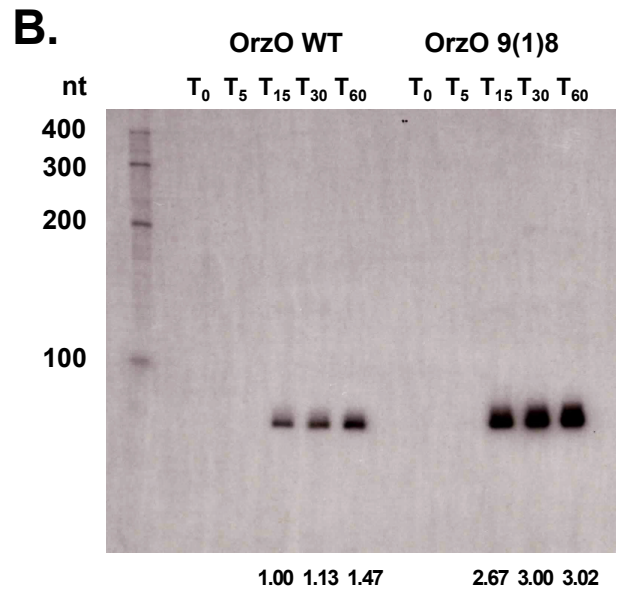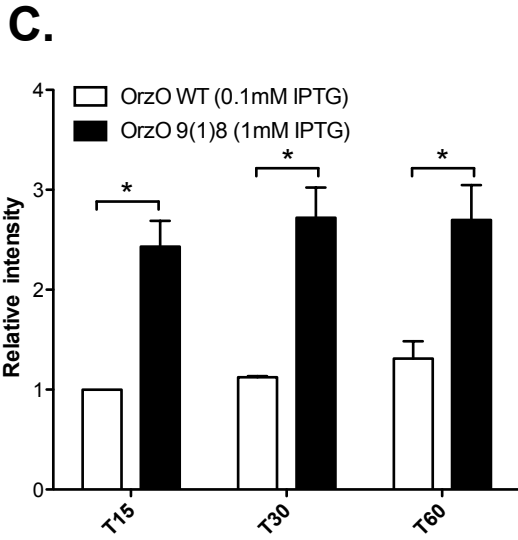

**Figure S6**



**A.**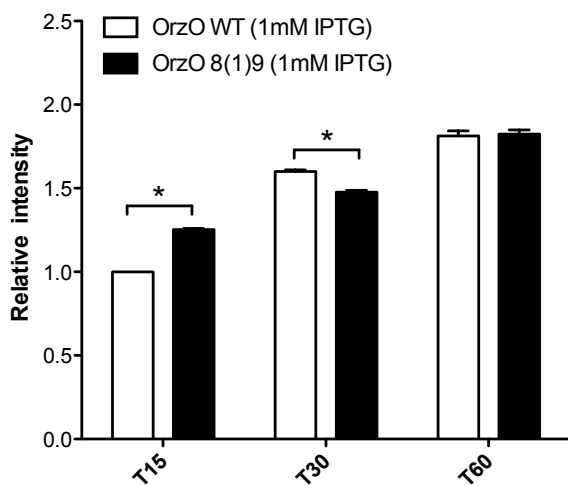**B.**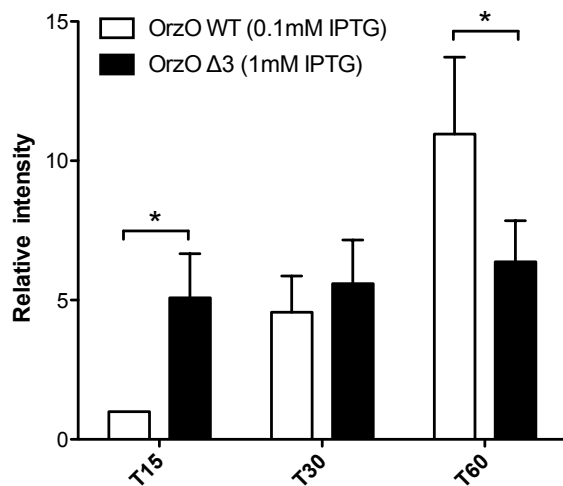**C.**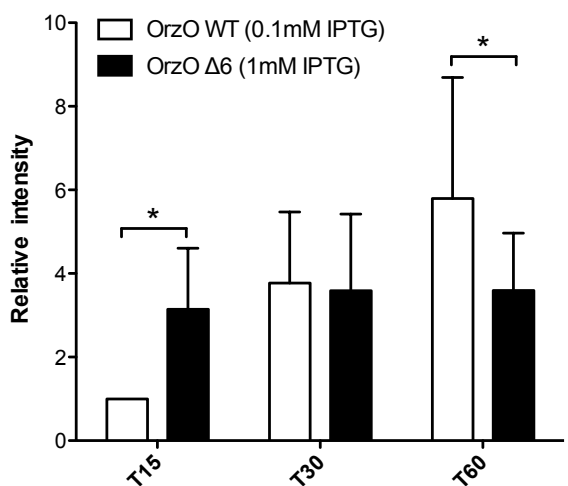**D.**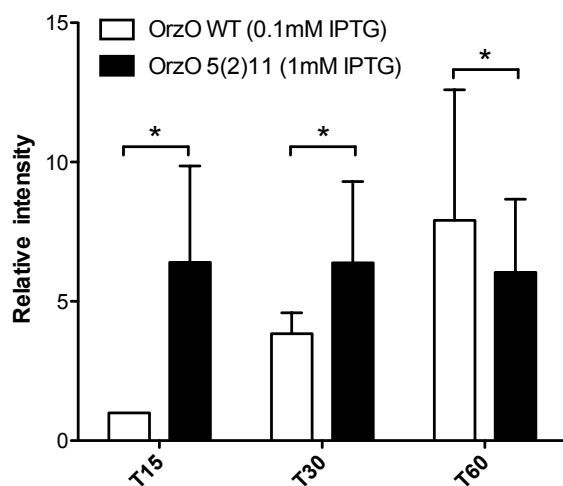**E.**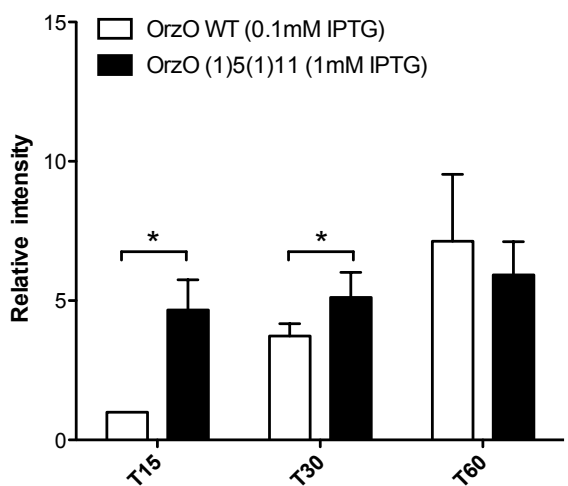**F.**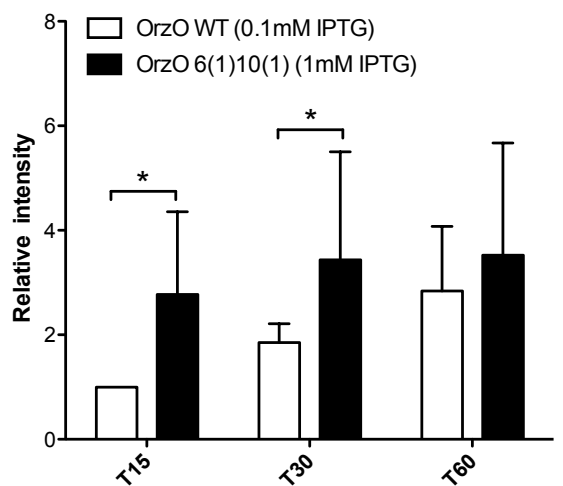**Figure S7**
